# Supplementary material for: RIN3 Is a Negative Regulator of Mast Cell Responses to SCF
Source: PubMed Central journal article supplement (PMC3502454; doi:10.1371/journal.pone.0049615), 2012-11-20
Supplement: pone.0049615.s001.pdf [file pone.0049615.s001.pdf]

**A**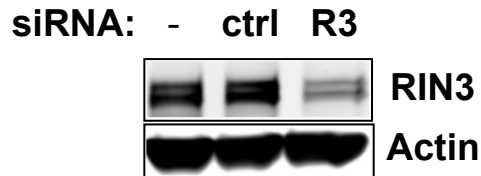**B**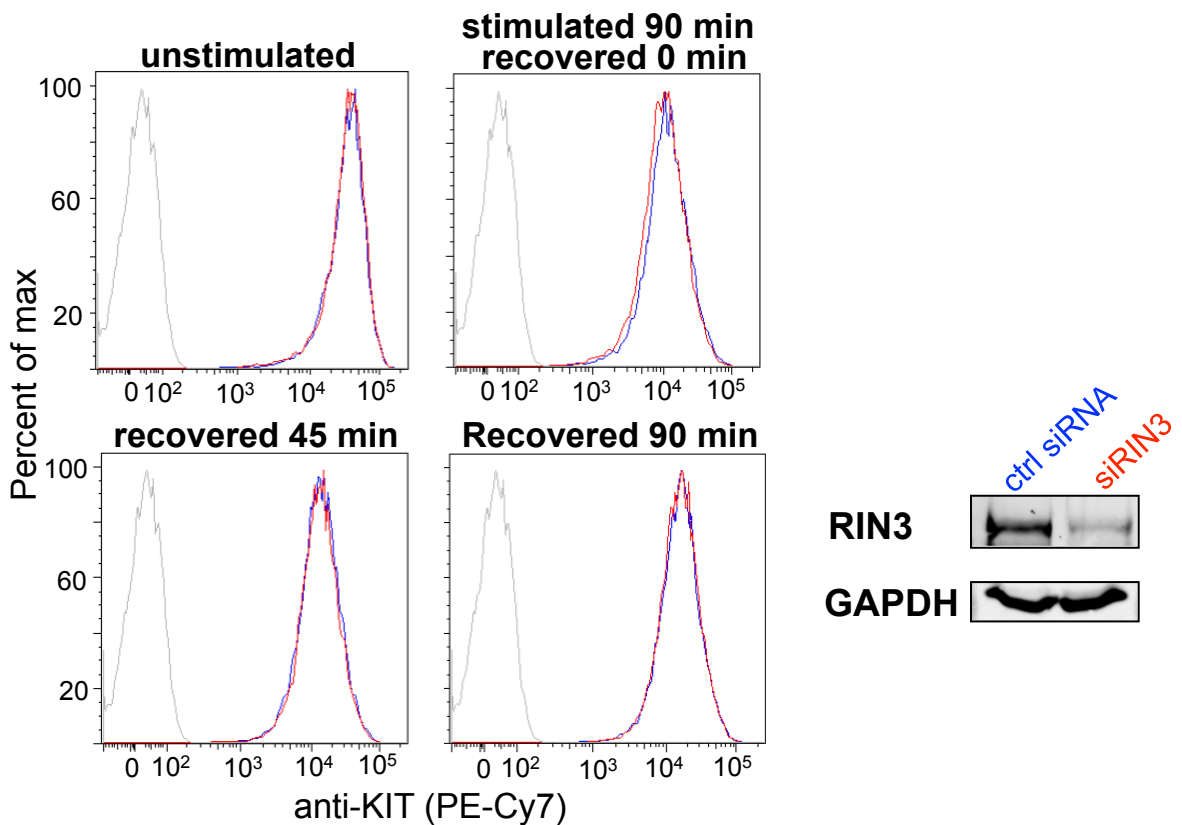

**Figure S1.** *RIN3* silencing does not affect *KIT* surface recovery.

**A.** Representative blot comparing levels of RIN3 in mock, ctrl siRNA, and RIN3 siRNA transfected cells. Transfection with siRNA did not affect wild type levels of RIN3. **B.** Cells were transfected with control (blue) or RIN3 siRNA (red). Surface expression of KIT was measured by flow cytometry before stimulation (top left), after stimulation with 5 ng/ml SCF (top right) and at two time points of recovery in SCF free media (bottom panels). Gray line represents unstained control. Immunoblot indicates level of RIN3 in lysates.
