# Supplementary material for: RIN3 Is a Negative Regulator of Mast Cell Responses to SCF
Source: PubMed Central journal article supplement (PMC3502454; doi:10.1371/journal.pone.0049615), 2012-11-20
Supplement: pone.0049615.s002.pdf [file pone.0049615.s002.pdf]

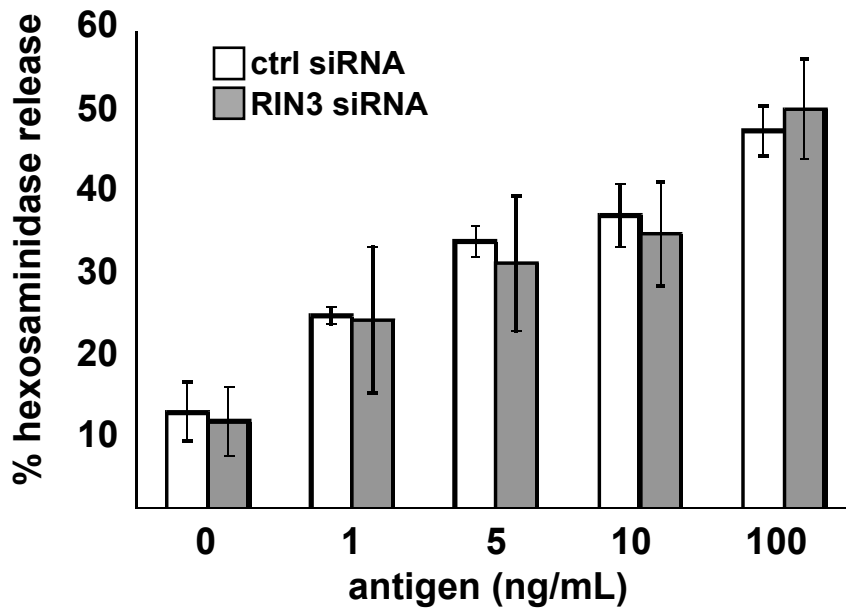

**Figure S2.** *RIN3* silencing does not affect degranulation.

The amount of granule release was measured in cells with control (white bars) or knock down levels of *RIN3* (gray bars). All cells were primed with biotinylated IgE and then incubated with indicated concentrations of streptavidin (antigen). Percent granule release was calculated as  $\beta$ -hexosaminidase activity: supernatant/(supernatant + lysate). Graph is compilation of two independent experiments performed in triplicate.
